# Supplementary material
Source: Springer Nature journal article supplement (http://www.springermedizin.de/resource/supplementary/12986_2010_337_MOESM1_ESM.pdf/25655856)

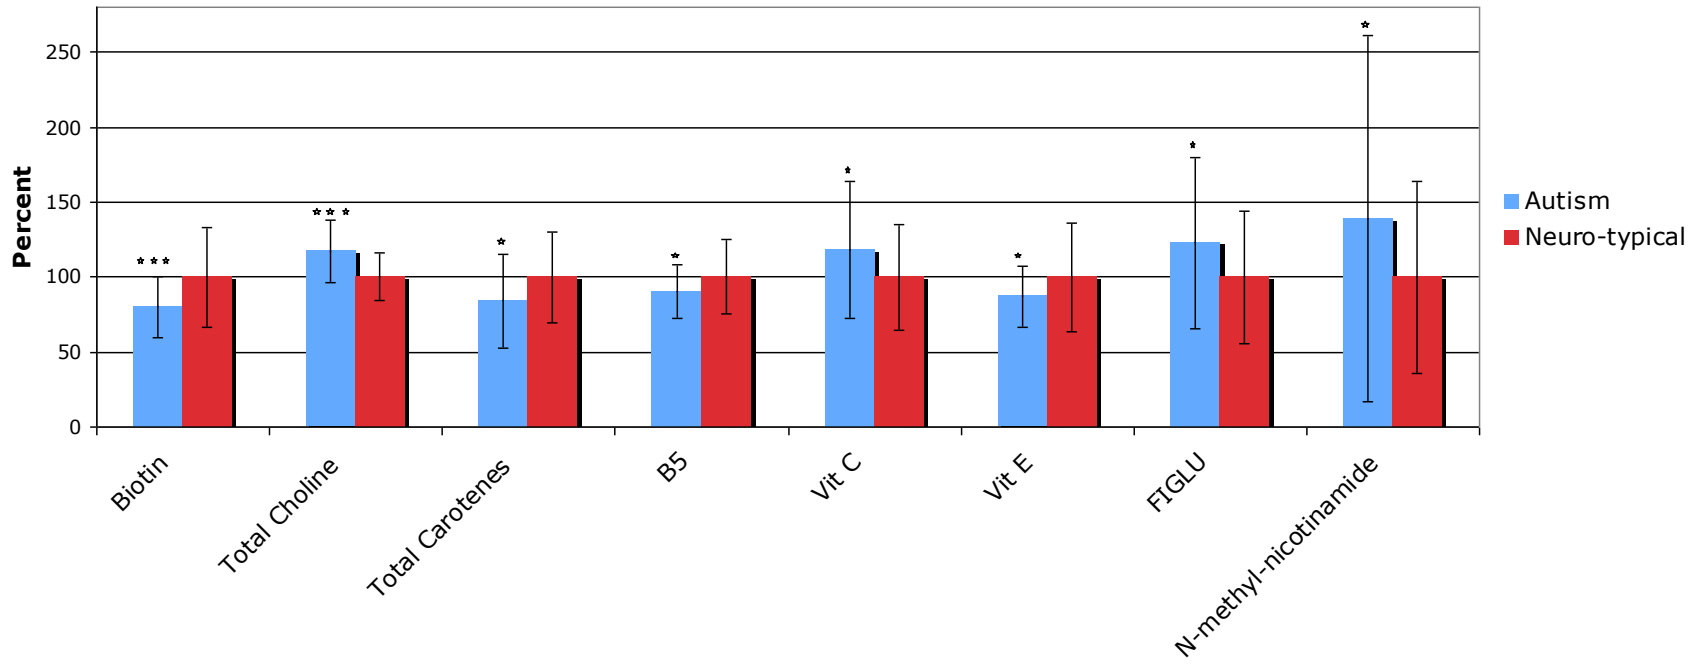

Supplement: MOESM1 [file 25655856]
